# Supplementary material for: A behavioral and genetic study of multiple paternity in a polygamous marine invertebrate, Octopus oliveri
Source: PeerJ. 2019 Jun 7;7:e6927. doi: 10.7717/peerj.6927 (PMC6557246; doi:10.7717/peerj.6927)
Supplement: Data S1 — Raw data for all behavioral observations, weights and measurements performed in this study. [file peerj-07-6927-s001.csv]

MID	FID	maleorder	m2msize	m2fsize	f2fsize	matingtime	archnpump	size	sizeg	remSP	eggs95	eggs95NEW	eggs80	eggs80NEW	eggstotal	eggsP95	eggsP95NEW	eggsP80	eggsP80NEW
M15	F1	1	s	s	l	2034	18	0	50	0	0	0	5	5	34	0	0	0.15	0.147058824
M33	F1	2	m	s	l	2642	19	1	90	0	4	4	4	4	34	0.12	0.12	0.12	0.117647059
M16	F1	3	l	l	l	8682	68	2	176	0	4	4	10	10	34	0.12	0.12	0.29	0.294117647
MU1	F1	0									7	7	6	2	34	0.21	0.21	0.18	0.058823529
MU2	F1	0									7	7	3	6	34	0.21	0.21	0.09	0.176470588
MU3	F1	0									4	3	2	3	34	0.12	0.09	0.06	0.088235294
MU4	F1	0									3	2	2	2	34	0.09	0.06	0.06	0.058823529
MU5	F1	0									3	3	2	2	34	0.09	0.09	0.06	0.058823529
MU6	F1	0									2	4	0	0	34	0.06	0.12	0	0
M33	F2	1	m	m	m	3491	24	1	90	0	11	11	12	12	34	0.32	0.32	0.35	0.352941176
M15	F2	2	s	s	m	1153	10	0	50	0	0	0	8	8	34	0	0	0.24	0.235294118
MU7	F2	0									21	21	12	12	34	0.62	0.62	0.35	0.352941176
MU8	F2	0									2	2	2	2	34	0.06	0.06	0.06	0.058823529
M10	F3	1	s	s	l	2751	34	0	54	0	19	19	22	22	34	0.56	0.56	0.65	0.647058824
MU9	F3	0									6	5	6	2	34	0.18	0.15	0.18	0.058823529
MU10	F3	0									5	4	4	6	34	0.15	0.12	0.12	0.176470588
MU11	F3	0									4	6	2	4	34	0.12	0.18	0.06	0.117647059
M78	F4	1	l	l	m	8551	70	2	150	2	26	26	28	28	34	0.76	0.76	0.82	0.823529412
M58	F4	2	s	s	m	485	5	0	52	0	1	1	4	4	34	0.03	0.03	0.12	0.117647059
MU12	F4	0									3	3	2	2	34	0.09	0.09	0.06	0.058823529
MU13	F4	0									3	3	0	0	34	0.09	0.09	0	0
MU14	F4	0									1	1	0	0	34	0.03	0.03	0	0
M58	F5	1	s	s	l	7366	36	0	52	0	0	0	2	2	34	0	0	0.06	0.058823529
M78	F5	2	l	s	l	1921	12	2	150	0	16	16	21	21	34	0.47	0.47	0.68	0.617647059
MU15	F5	0									5	5	3	3	34	0.18	0.15	0.09	0.088235294
MU16	F5	0									3	3	3	3	34	0.15	0.09	0.09	0.088235294
MU17	F5	0									3	3	0	0	34	0.15	0.09	0	0
MU18	F5	0									2	2	0	0	34	0.06	0.06	0	0
Unassigned	F5	0									5	5	5	5	34	0	0.15	0.15	0.147058824
M94	F6	1	m	m	m	7343	14	1	104	1	17	17	25	25	34	0.5	0.5	0.74	0.735294118
M99	F6	2	l	l	m	8914	16	2	154	1	3	3	4	4	34	0.09	0.09	0.12	0.117647059
M93	F6	3	s	s	m	2746	10	0	76	1	1	1	5	5	34	0.03	0.03	0.15	0.147058824
MU19	F6	0									9	6	0	0	34	0.26	0.18	0	0
MU20	F6	0									3	6	0	0	34	0.09	0.18	0	0
MU21	F6	0									1	1	0	0	34	0.03	0.03	0	0
M99	F7	1	l	l	s	1849	6	2	154	0	16	16	21	21	34	0.47	0.47	0.62	0.617647059
M94	F7	2	m	l	s	102	0	1	104	0	2	2	2	2	34	0.06	0.06	0.06	0.058823529
M93	F7	3	s	m	s	1578	10	0	76	0	0	0	0	0	34	0	0	0	0
MU22	F7	0									13	13	8	8	34	0.38	0.38	0.24	0.235294118
MU23	F7	0									3	3	3	3	34	0.09	0.09	0.09	0.088235294
M99	F8	1	l	l	l	3451	6	2	154	0	11	11	21	21	34	0.32	0.32	0.62	0.617647059
M93	F8	2	s	s	l	2703	19	0	76	1	2	2	4	4	34	0.06	0.06	0.12	0.117647059
M94	F8	3	m	m	l	1366	11	1	104	0	0	0	3	3	34	0	0	0.09	0.088235294
MU24	F8	0									7	6	4	4	34	0.21	0.18	0.12	0.117647059
MU25	F8	0									6	4	2	2	34	0.18	0.12	0.06	0.058823529
MU26	F8	0									4	3	0	0	34	0.12	0.09	0	0
MU27	F8	0									3	2	0	0	34	0.09	0.06	0	0
MU28	F8	0									1	6	0	0	34	0.03	0.18	0	0
